# Supplementary material
Source: publisher figshare collection journal article supplement (https://tandf.figshare.com/articles/dataset/_/5100010)
Supplement: Supplementary file 1 [file 1]

Archive with 2 entries (2 files):
- Supplemental File_Figure S1.pdf
- Supplemental File_Figure S2.xlsx
