# Supplementary material
Source: publisher figshare collection journal article supplement (https://tandf.figshare.com/articles/dataset/_/5100010)
Supplement: Supplementary file 1 [file 1 › Supplemental File_Figure S1.pdf]

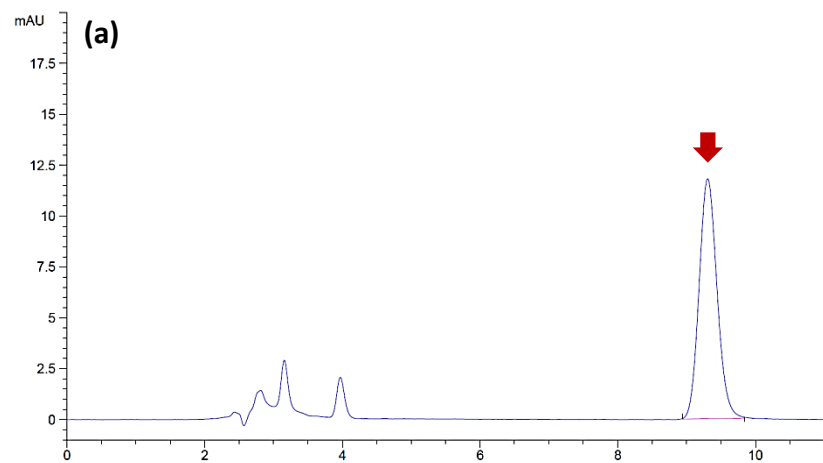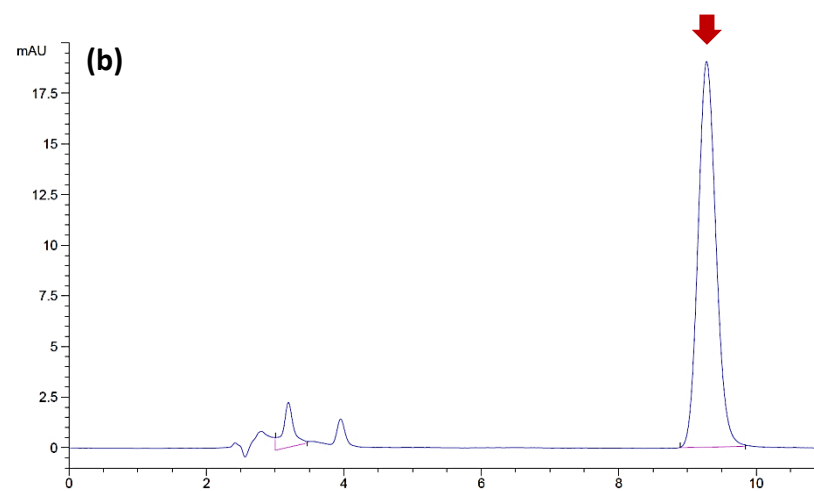

Figure S1. Representative chromatogram for the stoichiometry study (a) AD/SA cocrystal (b) AD raw material
