# Supplementary material
Source: publisher figshare collection journal article supplement (https://tandf.figshare.com/articles/dataset/_/5100010)
Supplement: Supplementary file 1 [file 1 › Supplemental File_Figure S2.xlsx]

## Sheet: 3751 0413 #1 ADF-CO-ag
Module	TG/DTA
Channel	TG-DTA
Data Name	3751 0413 #1 ADF-CO-ag
Measurement Time	2017-04-13 오후 4:25:48
Sample Name	3751 0413 #1 ADF-CO
Sample Weight	7.528	mg
Reference Name
Reference Weight	0	mg
Temperature Program		Cel	Cel	Cel/min	min	s	Gas1	Gas2	Store
	1	33	120	10	0	1	On	Off	On
	Temperature Program Mode	Ramp
	Cooling unit	Air	cooling
Operator Name	CCRF
Organization Name	Microsoft
Comment	Operator: CCRF
Read
3751 0413 #1 ADF-CO-ag TG
No.	Time	Temp	TG
	min	Cel	%
1	7.13333	100.064	99.891
3751 0413 #1 ADF-CO-ag DTA
No.	Time	Temp	DTA
	min	Cel	uW
1	2.93333	58.1407	-7.52129
Time	Temp.	DTA	TG	DTG
min	Cel	uV	ug	ug/min
0	32.4469	1.57071	7527.79	7.14844
0.0166667	32.455	1.57563	7527.67	7.44141
0.0333333	32.4926	1.58032	7527.54	8.16797
0.05	32.5427	1.58661	7527.41	9.16406
0.0666667	32.5779	1.59806	7527.23	9.46875
0.0833333	32.6163	1.61365	7527.07	9.89062
0.1	32.6356	1.63637	7526.88	10.1836
0.116667	32.7066	1.66086	7526.73	10.1836
0.133333	32.7657	1.69279	7526.55	9.91406
0.15	32.8067	1.73237	7526.38	9.63281
0.166667	32.8815	1.77644	7526.24	9.21094
0.183333	32.984	1.82406	7526.07	8.49609
0.2	33.0317	1.88044	7525.95	8.22656
0.216667	33.071	1.94153	7525.82	7.94531
0.233333	33.1734	2.00098	7525.71	7.80469
0.25	33.2604	2.06221	7525.56	7.6875
0.266667	33.3754	2.12143	7525.42	7.85156
0.283333	33.5083	2.17912	7525.31	7.58203
0.3	33.6635	2.23364	7525.18	7.16016
0.316667	33.8207	2.28577	7525.05	6.89062
0.333333	33.9898	2.33441	7524.94	6.90234
0.35	34.1193	2.38354	7524.83	6.76172
0.366667	34.3042	2.42589	7524.72	6.76172
0.383333	34.4845	2.46538	7524.61	6.91406
0.4	34.6505	2.50272	7524.48	6.92578
0.416667	34.8035	2.53858	7524.38	6.62109
0.433333	35.0138	2.56702	7524.26	6.63281
0.45	35.1792	2.59547	7524.16	6.35156
0.466667	35.3542	2.62075	7524.05	6.07031
0.483333	35.5417	2.642	7523.96	5.78906
0.5	35.7489	2.65897	7523.85	5.50781
0.516667	35.9495	2.67349	7523.77	5.08594
0.533333	36.1485	2.68539	7523.7	4.80469
0.55	36.3421	2.6944	7523.61	4.94531
0.566667	36.5556	2.7007	7523.54	4.78125
0.583333	36.7572	2.70493	7523.44	4.79297
0.6	36.9112	2.71054	7523.36	4.62891
0.616667	37.0852	2.71364	7523.28	4.47656
0.633333	37.2765	2.71361	7523.21	3.77344
0.65	37.4219	2.71396	7523.17	3.64453
0.666667	37.5948	2.71164	7523.1	3.35156
0.683333	37.8092	2.70509	7523.06	3.49219
0.7	37.9875	2.69884	7523	3.50391
0.716667	38.1612	2.69228	7522.93	3.91406
0.733333	38.3439	2.68485	7522.86	4.05469
0.75	38.4989	2.67885	7522.8	4.20703
0.766667	38.688	2.67062	7522.72	3.9375
0.783333	38.8929	2.66182	7522.65	3.65625
0.8	39.1065	2.65228	7522.58	2.80078
0.816667	39.3244	2.64241	7522.56	2.21484
0.833333	39.5107	2.63449	7522.53	1.5
0.85	39.6677	2.62817	7522.51	1.05469
0.866667	39.843	2.62112	7522.5	0.902344
0.883333	39.9921	2.61598	7522.48	0.914062
0.9	40.1613	2.61002	7522.47	1.19531
0.916667	40.3464	2.60401	7522.45	1.61719
0.933333	40.5155	2.60002	7522.42	1.76953
0.95	40.6527	2.59855	7522.39	1.61719
0.966667	40.8388	2.5946	7522.35	1.75781
0.983333	41.0041	2.59182	7522.33	1.34766
1	41.1748	2.58792	7522.31	0.785156
1.01667	41.3662	2.58226	7522.3	0.914062
1.03333	41.586	2.57346	7522.3	1.21875
1.05	41.7441	2.56844	7522.27	1.64062
1.06667	41.9263	2.56226	7522.24	1.78125
1.08333	42.1166	2.55603	7522.19	2.21484
1.1	42.3179	2.5492	7522.14	2.22656
1.11667	42.5031	2.54415	7522.13	2.35547
1.13333	42.7069	2.53749	7522.11	1.92188
1.15	42.8772	2.53251	7522.04	1.76953
1.16667	43.0676	2.52648	7522.01	0.902344
1.18333	43.2119	2.5235	7522	0.1875
1.2	43.3611	2.51987	7522.01	-0.527344
1.21667	43.5274	2.51496	7522.05	-0.949219
1.23333	43.7192	2.50896	7522.07	-0.796875
1.25	43.8933	2.50389	7522.09	-0.363281
1.26667	44.0691	2.49853	7522.08	0.0585938
1.28333	44.2594	2.49218	7522.06	0.199219
1.3	44.443	2.48652	7522.05	0.480469
1.31667	44.5983	2.48315	7522.05	0.199219
1.33333	44.7531	2.47966	7522.06	0.761719
1.35	44.9271	2.47483	7522.06	0.632812
1.36667	45.122	2.46884	7522.03	0.492188
1.38333	45.3102	2.46352	7521.99	0.9375
1.4	45.5126	2.4569	7522	1.34766
1.41667	45.7233	2.44942	7521.98	1.34766
1.43333	45.8982	2.44401	7521.96	1.61719
1.45	46.0492	2.44045	7521.93	2.17969
1.46667	46.209	2.4359	7521.88	2.02734
1.48333	46.3607	2.43133	7521.85	1.75781
1.5	46.5144	2.42675	7521.81	1.47656
1.51667	46.7109	2.41932	7521.79	1.33594
1.53333	46.8906	2.41184	7521.77	1.20703
1.55	47.0755	2.40382	7521.75	0.914062
1.56667	47.2627	2.39579	7521.74	1.05469
1.58333	47.4428	2.38784	7521.72	1.05469
1.6	47.6153	2.37994	7521.7	1.04297
1.61667	47.7918	2.3715	7521.68	0.902344
1.63333	47.9538	2.36305	7521.69	1.18359
1.65	48.1009	2.35473	7521.66	0.75
1.66667	48.2755	2.34387	7521.65	0.890625
1.68333	48.447	2.33281	7521.65	0.761719
1.7	48.6163	2.32091	7521.61	0.480469
1.71667	48.7866	2.30828	7521.59	0.199219
1.73333	48.983	2.29293	7521.61	0.46875
1.75	49.165	2.27693	7521.61	0.609375
1.76667	49.2907	2.262	7521.61	0.46875
1.78333	49.4545	2.24322	7521.58	0.597656
1.8	49.6347	2.22197	7521.55	0.597656
1.81667	49.7975	2.20012	7521.56	0.480469
1.83333	49.9416	2.17721	7521.56	-0.234375
1.85	50.1397	2.14941	7521.56	-0.234375
1.86667	50.3254	2.11995	7521.56	-0.515625
1.88333	50.4992	2.08816	7521.57	-0.515625
1.9	50.6597	2.0539	7521.59	-0.808594
1.91667	50.8386	2.01542	7521.6	-0.539062
1.93333	51.0143	1.97332	7521.6	-0.539062
1.95	51.1627	1.9286	7521.63	-0.269531
1.96667	51.2931	1.88044	7521.64	-0.117188
1.98333	51.4475	1.82542	7521.62	-0.128906
2	51.6141	1.76359	7521.64	-0.257812
2.01667	51.7653	1.69588	7521.62	-0.550781
2.03333	51.9406	1.62042	7521.63	-0.550781
2.05	52.0997	1.53874	7521.66	-0.5625
2.06667	52.2128	1.45271	7521.67	-0.269531
2.08333	52.353	1.3573	7521.65	-0.421875
2.1	52.5035	1.25319	7521.66	-0.128906
2.11667	52.6203	1.14234	7521.65	-0.128906
2.13333	52.7594	1.02027	7521.67	-0.703125
2.15	52.9417	0.885421	7521.68	-1.14844
2.16667	53.0526	0.745613	7521.69	-1.14844
2.18333	53.145	0.598435	7521.74	-1.44141
2.2	53.2855	0.438908	7521.77	-1.86328
2.21667	53.3978	0.272763	7521.79	-1.72266
2.23333	53.5181	0.0977169	7521.83	-1.86328
2.25	53.6539	-0.0859758	7521.85	-1.875
2.26667	53.7934	-0.277314	7521.89	-2.01562
2.28333	53.8647	-0.470365	7521.92	-2.02734
2.3	53.972	-0.670851	7521.95	-2.32031
2.31667	54.0913	-0.876714	7521.98	-2.46094
2.33333	54.1785	-1.08455	7522.03	-2.73047
2.35	54.2727	-1.29688	7522.09	-2.73047
2.36667	54.4339	-1.51746	7522.14	-2.87109
2.38333	54.5683	-1.73861	7522.19	-2.58984
2.4	54.6664	-1.95939	7522.24	-1.73438
2.41667	54.7721	-2.18293	7522.27	-1.17188
2.43333	54.872	-2.40718	7522.27	-0.621094
2.45	54.9717	-2.63282	7522.24	0.09375
2.46667	55.0542	-2.85958	7522.25	0.820312
2.48333	55.1366	-3.08755	7522.24	1.25391
2.5	55.2672	-3.31985	7522.22	1.67578
2.51667	55.3716	-3.55126	7522.19	2.68359
2.53333	55.4629	-3.78171	7522.13	3.38672
2.55	55.5632	-4.01131	7522.07	4.23047
2.56667	55.6377	-4.23714	7521.99	4.94531
2.58333	55.7163	-4.45997	7521.91	5.80078
2.6	55.8314	-4.68166	7521.8	6.50391
2.61667	55.927	-4.89583	7521.68	7.08984
2.63333	55.9938	-5.10154	7521.55	7.24219
2.65	56.1093	-5.30355	7521.44	7.23047
2.66667	56.2229	-5.49741	7521.29	7.39453
2.68333	56.326	-5.6821	7521.2	7.26562
2.7	56.4524	-5.86068	7521.08	7.11328
2.71667	56.597	-6.03258	7520.94	6.97266
2.73333	56.7111	-6.19461	7520.82	6.55078
2.75	56.8252	-6.35062	7520.72	5.67188
2.76667	56.9416	-6.50115	7520.63	4.67578
2.78333	57.0326	-6.645	7520.57	3.39844
2.8	57.1299	-6.78508	7520.53	2.25
2.81667	57.2573	-6.9226	7520.48	1.11328
2.83333	57.3701	-7.05116	7520.49	0.832031
2.85	57.4719	-7.16903	7520.49	0.269531
2.86667	57.5952	-7.27589	7520.47	0.410156
2.88333	57.7295	-7.36725	7520.47	0.5625
2.9	57.8595	-7.43909	7520.44	1.27734
2.91667	57.9979	-7.49113	7520.44	1.28906
2.93333	58.1407	-7.52129	7520.4	1.58203
2.95	58.2843	-7.52834	7520.39	2.4375
2.96667	58.4487	-7.51381	7520.35	3.16406
2.98333	58.6071	-7.4753	7520.3	4.17188
3	58.7711	-7.41364	7520.2	5.32031
3.01667	58.9596	-7.33079	7520.1	6.73828
3.03333	59.1355	-7.22369	7519.99	8.17969
3.05	59.3194	-7.09401	7519.86	9.45703
3.06667	59.5218	-6.94291	7519.68	10.6172
3.08333	59.6899	-6.76727	7519.47	11.332
3.1	59.9137	-6.57464	7519.26	11.7773
3.11667	60.1568	-6.36546	7519.07	11.4961
3.13333	60.3821	-6.13961	7518.88	11.0859
3.15	60.6087	-5.90346	7518.71	10.3594
3.16667	60.8728	-5.66392	7518.54	10.0781
3.18333	61.0831	-5.41841	7518.38	9.49219
3.2	61.2953	-5.17367	7518.21	8.49609
3.21667	61.5158	-4.93299	7518.08	7.62891
3.23333	61.7131	-4.69647	7517.94	6.35156
3.25	61.9445	-4.46897	7517.87	4.92188
3.26667	62.1711	-4.248	7517.8	3.64453
3.28333	62.3894	-4.03433	7517.75	2.21484
3.3	62.5811	-3.82748	7517.7	0.644531
3.31667	62.809	-3.63081	7517.72	-0.644531
3.33333	63.0026	-3.43979	7517.74	-2.21484
3.35	63.2158	-3.25837	7517.8	-3.92578
3.36667	63.4328	-3.08517	7517.87	-5.20312
3.38333	63.6608	-2.91964	7517.97	-6.48047
3.4	63.8603	-2.7586	7518.1	-8.20312
3.41667	64.0952	-2.60648	7518.21	-9.49219
3.43333	64.3171	-2.45968	7518.4	-10.6406
3.45	64.4833	-2.31509	7518.61	-12.2109
3.46667	64.6846	-2.17869	7518.81	-13.5117
3.48333	64.8892	-2.04821	7519.04	-14.3672
3.5	65.0783	-1.92186	7519.3	-15.0703
3.51667	65.2635	-1.80019	7519.57	-15.7852
3.53333	65.4653	-1.68406	7519.83	-15.9375
3.55	65.6629	-1.5719	7520.09	-15.9258
3.56667	65.8487	-1.46319	7520.37	-15.9258
3.58333	66.0336	-1.35779	7520.63	-15.6445
3.6	66.2228	-1.25605	7520.9	-15.0703
3.61667	66.4317	-1.15871	7521.14	-14.4961
3.63333	66.6098	-1.06212	7521.38	-13.5117
3.65	66.8178	-0.970082	7521.59	-11.9414
3.66667	67.0114	-0.880196	7521.8	-10.9453
3.68333	67.1715	-0.790277	7521.96	-9.66797
3.7	67.339	-0.702931	7522.12	-7.95703
3.71667	67.5404	-0.620152	7522.23	-6.80859
3.73333	67.697	-0.536109	7522.34	-5.67188
3.75	67.9	-0.456658	7522.42	-4.53516
3.76667	68.0918	-0.378444	7522.47	-3.66797
3.78333	68.2816	-0.301334	7522.53	-2.8125
3.8	68.4532	-0.224232	7522.59	-2.25
3.81667	68.663	-0.15094	7522.59	-1.6875
3.83333	68.8369	-0.0764166	7522.62	-1.25391
3.85	68.9824	-0.00104737	7522.64	-0.84375
3.86667	69.147	0.072039	7522.65	-0.984375
3.88333	69.3295	0.142971	7522.67	-0.703125
3.9	69.4855	0.21472	7522.66	-0.679688
3.91667	69.6538	0.284931	7522.69	-0.257812
3.93333	69.8614	0.351964	7522.69	-0.257812
3.95	70.0626	0.418	7522.68	0.0234375
3.96667	70.2108	0.485321	7522.68	0.0351562
3.98333	70.393	0.548972	7522.69	-0.128906
4	70.5544	0.612003	7522.7	-0.691406
4.01667	70.7302	0.672839	7522.7	-0.539062
4.03333	70.9146	0.731931	7522.71	-0.820312
4.05	71.1034	0.79021	7522.73	-0.820312
4.06667	71.2994	0.846351	7522.75	-0.667969
4.08333	71.4953	0.900905	7522.76	-0.398438
4.1	71.6841	0.954197	7522.76	-0.257812
4.11667	71.8414	1.00783	7522.77	0.445312
4.13333	72.0223	1.05874	7522.75	0.585938
4.15	72.1971	1.10826	7522.74	0.433594
4.16667	72.36	1.15734	7522.73	0.726562
4.18333	72.505	1.20538	7522.71	0.292969
4.2	72.6636	1.25108	7522.71	-0.140625
4.21667	72.8222	1.29478	7522.72	-0.140625
4.23333	72.9608	1.33892	7522.74	0.292969
4.25	73.1402	1.37872	7522.73	0.574219
4.26667	73.3136	1.41745	7522.7	1.14844
4.28333	73.4666	1.45569	7522.67	1.58203
4.3	73.6411	1.49137	7522.66	1.58203
4.31667	73.8299	1.52491	7522.6	1.42969
4.33333	73.9677	1.56037	7522.59	1.14844
4.35	74.125	1.59377	7522.58	0.574219
4.36667	74.307	1.62453	7522.57	0.0117188
4.38333	74.4569	1.65627	7522.58	0.0117188
4.4	74.6205	1.68538	7522.57	0.164062
4.41667	74.8104	1.71189	7522.59	0.164062
4.43333	74.9891	1.73782	7522.58	1.01953
4.45	75.1527	1.76372	7522.55	1.28906
4.46667	75.3326	1.78728	7522.53	1.57031
4.48333	75.4865	1.81162	7522.48	0.996094
4.5	75.6324	1.83515	7522.46	1.00781
4.51667	75.7764	1.85786	7522.47	0.433594
4.53333	75.9741	1.87734	7522.47	0.152344
4.55	76.1569	1.89681	7522.44	-0.128906
4.56667	76.3146	1.9171	7522.48	0.152344
4.58333	76.4703	1.93729	7522.47	0.128906
4.6	76.6321	1.95633	7522.46	0.269531
4.61667	76.7637	1.97594	7522.48	0.84375
4.63333	76.8765	1.99574	7522.46	1.125
4.65	77.0326	2.0128	7522.43	1.41797
4.66667	77.1868	2.02929	7522.39	1.57031
4.68333	77.3597	2.04498	7522.35	1.14844
4.7	77.5117	2.06146	7522.34	0.726562
4.71667	77.681	2.07688	7522.34	0.292969
4.73333	77.8611	2.09059	7522.34	0.140625
4.75	78.018	2.10524	7522.35	-0.28125
4.76667	78.1616	2.11924	7522.35	-0.140625
4.78333	78.3419	2.13055	7522.34	-0.28125
4.8	78.5081	2.14221	7522.36	0
4.81667	78.6669	2.15431	7522.36	0.0117188
4.83333	78.8232	2.16645	7522.35	0.28125
4.85	78.9978	2.17788	7522.35	0.714844
4.86667	79.1189	2.19218	7522.33	0.28125
4.88333	79.2901	2.20308	7522.3	0.140625
4.9	79.4553	2.21361	7522.32	-0.433594
4.91667	79.5969	2.22498	7522.33	-0.574219
4.93333	79.7388	2.23626	7522.35	-0.855469
4.95	79.9245	2.24491	7522.37	0.128906
4.96667	80.0909	2.25416	7522.37	-0.152344
4.98333	80.2182	2.266	7522.36	0.28125
5	80.3646	2.27668	7522.33	0.574219
5.01667	80.5473	2.28517	7522.35	0.703125
5.03333	80.7274	2.29301	7522.35	0.433594
5.05	80.8839	2.30248	7522.31	0.574219
5.06667	81.0443	2.31125	7522.3	0.269531
5.08333	81.203	2.31959	7522.3	-0.164062
5.1	81.3482	2.32829	7522.31	-0.585938
5.11667	81.4668	2.33845	7522.34	-0.445312
5.13333	81.6063	2.34742	7522.35	-0.445312
5.15	81.7577	2.35583	7522.35	-0.152344
5.16667	81.9173	2.36361	7522.34	0.140625
5.18333	82.0678	2.37168	7522.35	0.28125
5.2	82.2213	2.37933	7522.33	-0.0117188
5.21667	82.3831	2.3867	7522.33	0.5625
5.23333	82.5276	2.39482	7522.34	0.714844
5.25	82.7072	2.40132	7522.32	0.984375
5.26667	82.863	2.40877	7522.31	1.27734
5.28333	83.0303	2.41642	7522.27	1.85156
5.3	83.1704	2.42492	7522.24	1.85156
5.31667	83.3481	2.43134	7522.21	2.27344
5.33333	83.4851	2.43983	7522.17	2.56641
5.35	83.6529	2.44721	7522.12	3.26953
5.36667	83.8175	2.45353	7522.06	3.55078
5.38333	83.9709	2.46072	7521.99	3.97266
5.4	84.0973	2.46942	7521.92	4.11328
5.41667	84.2397	2.47685	7521.85	3.97266
5.43333	84.3843	2.48365	7521.77	3.69141
5.45	84.5305	2.49036	7521.74	3.55078
5.46667	84.6873	2.49631	7521.66	3.12891
5.48333	84.8649	2.50073	7521.61	2.98828
5.5	85.0176	2.50661	7521.56	2.41406
5.51667	85.1634	2.51209	7521.53	2.12109
5.53333	85.2945	2.51865	7521.5	1.69922
5.55	85.4468	2.52429	7521.49	1.54688
5.56667	85.5917	2.52964	7521.47	1.26562
5.58333	85.734	2.53454	7521.45	1.41797
5.6	85.8973	2.53888	7521.4	0.855469
5.61667	86.0863	2.54135	7521.38	0.28125
5.63333	86.2563	2.54361	7521.39	-0.140625
5.65	86.415	2.54611	7521.4	-0.574219
5.66667	86.595	2.5478	7521.43	-0.738281
5.68333	86.75	2.55014	7521.43	-0.164062
5.7	86.855	2.5544	7521.43	0.117188
5.71667	86.9904	2.55771	7521.43	0.550781
5.73333	87.1265	2.56145	7521.43	1.125
5.75	87.2865	2.56376	7521.4	1.41797
5.76667	87.4528	2.56581	7521.36	1.125
5.78333	87.6336	2.56811	7521.36	1.125
5.8	87.784	2.57215	7521.32	1.26562
5.81667	87.9222	2.57695	7521.32	0.972656
5.83333	88.0749	2.58106	7521.31	1.125
5.85	88.23	2.5854	7521.27	1.83984
5.86667	88.3636	2.59099	7521.24	2.27344
5.88333	88.5395	2.59423	7521.19	2.12109
5.9	88.7218	2.59762	7521.13	2.12109
5.91667	88.8566	2.60442	7521.11	1.69922
5.93333	88.9812	2.61178	7521.1	1.11328
5.95	89.1497	2.6169	7521.1	0.832031
5.96667	89.278	2.62514	7521.08	0.410156
5.98333	89.4181	2.63217	7521.06	-0.0117188
6	89.5983	2.63653	7521.07	-0.0117188
6.01667	89.7742	2.64193	7521.08	-0.28125
6.03333	89.9398	2.64756	7521.09	-0.292969
6.05	90.107	2.65313	7521.1	-0.292969
6.06667	90.2523	2.66092	7521.08	-0.292969
6.08333	90.3975	2.66958	7521.1	-0.304688
6.1	90.5755	2.67579	7521.11	-0.304688
6.11667	90.7427	2.68282	7521.12	-0.433594
6.13333	90.8861	2.69081	7521.13	-0.0117188
6.15	91.0736	2.69637	7521.14	0.550781
6.16667	91.2187	2.70328	7521.11	1.125
6.18333	91.337	2.71227	7521.07	1.98047
6.2	91.4885	2.71972	7521.05	2.53125
6.21667	91.6588	2.72516	7521	2.82422
6.23333	91.8044	2.73194	7520.95	3.53906
6.25	91.967	2.73802	7520.87	3.67969
6.26667	92.1251	2.74344	7520.82	4.11328
6.28333	92.2518	2.75108	7520.75	4.26562
6.3	92.4037	2.75857	7520.65	4.40625
6.31667	92.5587	2.76608	7520.58	4.125
6.33333	92.708	2.77324	7520.53	3.70312
6.35	92.8828	2.77915	7520.47	2.97656
6.36667	93.0632	2.78463	7520.42	3.11719
6.38333	93.1989	2.79265	7520.38	2.54297
6.4	93.344	2.79991	7520.33	2.40234
6.41667	93.5043	2.80633	7520.28	2.37891
6.43333	93.648	2.81307	7520.27	2.10938
6.45	93.7493	2.82201	7520.23	1.25391
6.46667	93.9016	2.82786	7520.21	1.25391
6.48333	94.0594	2.83333	7520.19	0.679688
6.5	94.1908	2.84051	7520.18	0.421875
6.51667	94.3452	2.8474	7520.18	-0.0234375
6.53333	94.5263	2.85213	7520.17	-0.0234375
6.55	94.6929	2.85762	7520.17	-0.0234375
6.56667	94.8348	2.86424	7520.21	0.117188
6.58333	94.9649	2.87076	7520.18	0.246094
6.6	95.0929	2.87754	7520.17	1.10156
6.61667	95.2405	2.88465	7520.14	1.10156
6.63333	95.3722	2.89229	7520.13	1.26562
6.65	95.5093	2.89948	7520.11	1.6875
6.66667	95.7044	2.90415	7520.09	1.69922
6.68333	95.8956	2.90926	7520.05	0.996094
6.7	96.05	2.91522	7520.01	0.996094
6.71667	96.2164	2.92071	7520.02	0.984375
6.73333	96.4035	2.92512	7520.02	0.84375
6.75	96.5804	2.93017	7520	1.125
6.76667	96.7167	2.93718	7519.96	1.82812
6.78333	96.8762	2.94336	7519.94	2.25
6.8	97.0227	2.95026	7519.9	2.09766
6.81667	97.1559	2.95813	7519.84	2.10938
6.83333	97.278	2.96664	7519.83	1.67578
6.85	97.4389	2.97288	7519.79	1.11328
6.86667	97.5927	2.97887	7519.78	0.984375
6.88333	97.7644	2.98433	7519.79	0.84375
6.9	97.9509	2.98891	7519.76	0.257812
6.91667	98.0955	2.99551	7519.75	0.269531
6.93333	98.234	3.00288	7519.77	0.257812
6.95	98.3916	3.00985	7519.74	0.105469
6.96667	98.5523	3.01638	7519.74	-0.175781
6.98333	98.6905	3.02406	7519.75	-0.304688
7	98.8457	3.03111	7519.75	-0.75
7.01667	98.9962	3.03868	7519.78	-0.738281
7.03333	99.1552	3.04523	7519.81	-1.01953
7.05	99.282	3.0533	7519.82	-0.890625
7.06667	99.4366	3.06024	7519.83	-0.609375
7.08333	99.5848	3.06727	7519.84	0.117188
7.1	99.742	3.07373	7519.82	0.398438
7.11667	99.8873	3.08166	7519.82	0.820312
7.13333	100.064	3.08886	7519.79	1.54688
7.15	100.2	3.09735	7519.78	1.83984
7.16667	100.382	3.1037	7519.73	1.53516
7.18333	100.552	3.11042	7519.69	1.82812
7.2	100.689	3.1178	7519.69	2.12109
7.21667	100.846	3.12394	7519.65	2.10938
7.23333	101.018	3.1291	7519.6	2.39062
7.25	101.149	3.13663	7519.57	2.69531
7.26667	101.302	3.14298	7519.51	2.54297
7.28333	101.492	3.1482	7519.47	2.25
7.3	101.642	3.15492	7519.44	1.96875
7.31667	101.772	3.1629	7519.39	1.82812
7.33333	101.921	3.17035	7519.38	1.95703
7.35	102.076	3.17765	7519.34	2.09766
7.36667	102.231	3.18501	7519.3	1.96875
7.38333	102.366	3.19432	7519.27	2.10938
7.4	102.536	3.202	7519.23	2.25
7.41667	102.703	3.20941	7519.22	2.25
7.43333	102.856	3.21727	7519.18	1.82812
7.45	102.986	3.22632	7519.13	1.53516
7.46667	103.149	3.23298	7519.1	1.53516
7.48333	103.303	3.24071	7519.09	1.24219
7.5	103.447	3.2489	7519.09	1.39453
7.51667	103.587	3.25737	7519.06	1.6875
7.53333	103.744	3.26438	7519.01	1.96875
7.55	103.908	3.27132	7518.96	1.82812
7.56667	104.068	3.27775	7518.94	1.69922
7.58333	104.244	3.28295	7518.94	1.40625
7.6	104.417	3.28794	7518.9	1.25391
7.61667	104.589	3.29363	7518.88	1.6875
7.63333	104.73	3.30077	7518.86	1.54688
7.65	104.909	3.30634	7518.82	1.53516
7.66667	105.067	3.3128	7518.78	1.53516
7.68333	105.204	3.32107	7518.78	1.81641
7.7	105.34	3.32879	7518.76	1.80469
7.71667	105.51	3.33521	7518.72	2.23828
7.73333	105.619	3.34429	7518.67	2.23828
7.75	105.732	3.35322	7518.62	2.09766
7.76667	105.9	3.3596	7518.59	1.95703
7.78333	106.071	3.36603	7518.57	1.82812
7.8	106.219	3.37361	7518.54	1.53516
7.81667	106.376	3.38037	7518.51	1.53516
7.83333	106.544	3.38789	7518.48	1.39453
7.85	106.695	3.39665	7518.46	1.10156
7.86667	106.834	3.40626	7518.44	0.527344
7.88333	106.979	3.41565	7518.44	0.539062
7.9	107.138	3.42453	7518.45	0.539062
7.91667	107.31	3.43217	7518.44	0.679688
7.93333	107.466	3.43893	7518.41	0.832031
7.95	107.614	3.44624	7518.4	0.972656
7.96667	107.789	3.45166	7518.38	0.820312
7.98333	107.963	3.45727	7518.36	0.820312
8	108.101	3.46498	7518.37	0.398438
8.01667	108.242	3.47365	7518.35	-0.175781
8.03333	108.412	3.48136	7518.36	-0.175781
8.05	108.579	3.48902	7518.37	-0.175781
8.06667	108.734	3.49703	7518.38	0.105469
8.08333	108.895	3.5047	7518.38	0.667969
8.1	109.056	3.51278	7518.34	1.24219
8.11667	109.222	3.52058	7518.32	1.52344
8.13333	109.356	3.53031	7518.29	1.52344
8.15	109.498	3.54	7518.26	1.39453
8.16667	109.654	3.54959	7518.25	1.53516
8.18333	109.814	3.55893	7518.23	1.53516
8.2	109.948	3.56877	7518.19	1.53516
8.21667	110.083	3.57865	7518.18	1.81641
8.23333	110.235	3.58724	7518.14	1.80469
8.25	110.391	3.59489	7518.1	1.66406
8.26667	110.539	3.60242	7518.08	2.09766
8.28333	110.71	3.60889	7518.05	2.23828
8.3	110.858	3.61623	7518.01	2.09766
8.31667	111.009	3.6242	7517.95	1.81641
8.33333	111.154	3.63252	7517.93	1.81641
8.35	111.318	3.64024	7517.92	1.24219
8.36667	111.458	3.64976	7517.9	1.11328
8.38333	111.63	3.65761	7517.88	1.25391
8.4	111.79	3.6662	7517.86	1.39453
8.41667	111.978	3.67397	7517.84	1.25391
8.43333	112.129	3.68303	7517.8	1.54688
8.45	112.286	3.69109	7517.81	1.53516
8.46667	112.466	3.69797	7517.77	1.67578
8.48333	112.656	3.70426	7517.73	1.95703
8.5	112.8	3.71239	7517.7	2.67188
8.51667	112.941	3.72053	7517.66	2.37891
8.53333	113.112	3.72739	7517.6	2.36719
8.55	113.243	3.73635	7517.55	1.94531
8.56667	113.358	3.74666	7517.54	1.80469
8.58333	113.509	3.7549	7517.52	0.949219
8.6	113.677	3.76282	7517.5	1.10156
8.61667	113.829	3.77187	7517.48	0.820312
8.63333	113.995	3.78011	7517.46	0.679688
8.65	114.171	3.78787	7517.47	0.246094
8.66667	114.329	3.79642	7517.45	0.09375
8.68333	114.465	3.80312	7517.46	-0.503906
8.7	114.566	3.80816	7517.46	-0.796875
